## **Prevalence of blindness and vision impairment among people 50 years and older in Nepal: a national Rapid Assessment of Avoidable Blindness survey**

**Type of manuscript:** Original article

**Title:** Prevalence of Blindness and visual disabilities among 50 years and older population of Nepal – A Rapid Assessment for avoidable blindness survey in 2019.

**Running title:** RAAB in Nepal

**Authors:** Sailesh Kumar Mishra, <sup>1</sup> Ranjan Shah, <sup>1</sup>Parikshit Gogate, <sup>2,3,4</sup> Yuddha Dhoj Sapkota,<sup>5</sup> Reeta Gurung, <sup>6</sup> Mohan Krishna Shrestha, <sup>6</sup> Islay Mactaggart,<sup>7</sup> Ian McCormick,<sup>7</sup> Brish Bahadur Shahi, <sup>8</sup> Rajiv Khandekar,<sup>9</sup> Matthew Burton. <sup>7</sup>

**Affiliations:**

1. Nepal Netra Jyoti Sangh, Kathmandu, Nepal
2. Community Eye Care Foundation, Dr. Gogate's Eye Clinic, Pune, India
3. Department of Ophthalmology, D.Y.Patil Medical College, Pimpri, Pune, India
4. School of Health Sciences, Queens University, Belfast, UK
5. International Agency for Prevention of Blindness, South East Asia office, Kathmandu, Nepal
6. Tilganga Eye Institute, Kathmandu, Nepal
7. International Centre for Eye Health, London School of Hygiene and Tropical Medicine, London, UK
8. Ministry of Social Development, Karnali Province, Nepal
9. Department of Ophthalmology & Visual Sciences, Faculty of Medicine, The University of British Columbia, Vancouver, Canada

**Address of corresponding author:** Dr. Parikshit Gogate. Community Eye Care Foundation, Dr. Gogate's Eye Clinic, Kumar Garima, Tadiwala road, Pune. 411001. India

**Email:** parikshitgogate@hotmail.com

**Funding:** Nepal Netra Jyoti Sangh, Eye Care Foundation (ECF), Seva Foundation CBM, Nepal Red Cross Society (NRCS)

**Word count:** Abstract: 261; Main manuscript: 2869

**Tables:** 6

**Figures:** 2

**References:** 25

**Acknowledgement:**

**NOTE:** This preprint reports new research that has not been certified by peer review and should not be used to guide clinical practice.

All the ophthalmic and administrative human resource from Mechi Eye Hospital, Biratnagar Eye Hospital, Sagarmatha Chaudhary Eye Hospital, Gaur Eye Hospital, RM Kedia Eye Hospital, Tilganga Institute of Ophthalmology, Himalaya Eye Hospital, Lumbini Eye Institute, Fateh Baal Eye Hospital, Geta Eye Hospital and Surkhet Eye Hospital. They provided the human resource (Ophthalmologist, Ophthalmic Assistants and health workers) for the survey. We thank the hospital manager and chief medical director of each hospital for their cooperation and meticulous coordination during the survey. Thanks also to Nabin Rai, Manish Khatiwada and Abhishek Kumar Jha.

Nepal Health Research Council (NHRC) had given ethics committee approval for the study. IAPB played a technical role in training, executing and consolidating these studies.

## ABSTRACT

**Purpose:** To determine the prevalence and causes of blindness and vision impairment among people 50 years and older in Nepal.

**Methods:** We conducted seven provincial-level Rapid Assessment of Avoidable Blindness (RAAB) cross-sectional, population-based surveys between 2018-2021. Provincial prevalence estimates were weighted to give nationally representative estimates. Sampling, enumeration, and examination of the population 50 years and older were done at the province level following standard RAAB protocol.

**Results:** Across seven surveys, we enrolled 33,228 individuals, of whom 32,565 were examined (response rate 98%). Females (n=17,935) made up 55% of the sample. The age-sex-province weighted national prevalence of blindness (better eye presenting visual acuity <3/60) was 1.1% (95% confidence interval [CI] 1.0-1.2%), and any vision impairment <6/12 was 20.7% (95% CI 19.9-21.5%). The prevalence of blindness and any vision impairment were both higher in women than men (1.3% [95% CI 1.1-1.5%] vs 0.9% [95% CI 0.7-1.0%]). Age-sex weighted blindness prevalence was highest in Lumbini Province (1.8% [95% CI 1.3-2.2%]) and lowest in Bagmati Province (0.7% [95% CI 0.4-0.9%]) and Sudurpaschim Province (0.7% [95% CI 0.4-0.9%]). Cataract (65.2%) was the leading cause of blindness in our sample, followed by corneal opacity (6.4%), glaucoma (5.8%) and age-related macular degeneration (5.3%). Other posterior segment diseases accounted for 8.4% of cases.

**Conclusion:** The prevalence of blindness was higher among women than men and varied by province. The Lumbini and Madesh Provinces in the Terai (plains) region had higher prevalence of blindness than elsewhere. Cataract was the leading cause of blindness, severe vision impairment and moderate vision impairment while refractive error was the leading cause of mild vision impairment.

## KEYWORDS

RAAB, Blindness, Visual impairment, Cataract, Corneal blindness, Nepal

## INTRODUCTION

Nepal has a long history of conducting population-based surveys of vision impairment and blindness. The first national survey in 1981 found a best-corrected blindness prevalence (visual acuity  $<3/60$  in the better eye) of 0.84% and moderate to severe vision impairment prevalence (visual acuity  $<6/18$  and  $\geq 3/60$ ) of 1.85% in the population aged 10 years and older. [1] Cataract was the leading cause of blindness, accounting for 80% of avoidable cases. [1] Shortly after this study, the Nepal Netra Jyoti Sangh (NNJS) was set up as an umbrella organisation of non-governmental organisations, under the aegis of the Government of Nepal, to reduce blindness and vision impairment. [2] A network of primary eye care centres, staffed by ophthalmic assistants, was established and linked to secondary and tertiary eye care facilities with help from international developmental agencies. Nepal was one of the first countries to endorse the World Health Organization–International Agency for the Prevention of Blindness initiative “VISION 2020 The Right to Sight” and, in 2001, developed its first national eye health plan.[3]

In 1995, population-based surveys were done in two zones (the fourteen first-level subnational administrative units of Nepal until 2015), where little change in the prevalence of blindness since 1981 was found.[4] After that, a subset of districts in each of the three zones were surveyed using a custom survey design in 2002 (n=1)[5] and 2006 (n=2).[6] In 2008-2010, a series of ten Rapid Assessment of Avoidable Blindness (RAAB) surveys was done across the remaining eleven zones. The prevalence of blindness and vision impairment in the all-age population was estimated to have decreased from 0.84% in 1981 to 0.35% in 2011 (extrapolated from estimates among people aged 50 years and older).[7]

The last forty years have seen enormous multi-sectorial efforts to improve eye health in Nepal. The number of ophthalmologists has increased from seven in 1981 to 364 in 2019, while the number of optometrists has increased from zero to 857 and ophthalmic assistants increased from zero to 1,246 in the same period.[8] The eye hospitals set up with NNJS collectively performed almost 350,000 cataract surgeries in 2019 (rising from 11,002 in 1995).

There has not been a national prevalence of blindness survey since 1981, and no district or provincial study has been conducted since 2010. RAAB is a relatively accurate, fast, and cost-effective method to estimate the prevalence of blindness in the population 50 years and older. This study aimed to conduct a new nationally representative RAAB, including seven separate surveys of each of seven newly formed provinces in the country. Here, we present vision impairment and blindness estimates for the country and provinces.

## **METHODS**

Ethics approval was obtained from the Nepal Health Research Council under the Ministry of Health, Government of Nepal. The survey conformed to the tenets of the Declaration of Helsinki. Written informed consent was obtained from all participants before they enrolled in the study.

We conducted seven provincial-level cross-sectional, population-based surveys between 2018-2021: one Rapid Assessment of Avoidable Blindness survey per province (Figure 1). Together, the provincial-level sampling frames represented Nepal at the national level. (Table 1)

### ***Sampling***

Each provincial-level sample size calculation was based on an assumed prevalence of bilateral blindness in the population aged 50 years and older, using estimates from previous subnational RAAB surveys in Nepal done in 2008-2010, and the size of the population 50

years and older in that province according to the 2011 census (table 1). Other parameters in the sample size calculations were consistent across the provinces: a relative precision of 20%, 95% confidence level, a design effect of 1.4 for a cluster size of 35 people and a 10% non-response rate. Sample size calculations were performed using the standard RAAB software. RAAB uses a two-stage cluster random sampling methodology with same day enumeration and examination. We used wards (the lowest level population units defined in the 2011 census) as our primary sampling units. The total list of wards and their all-age population sizes (obtained from Central Bureau of Statistics, Ministry of Information and Technology) made up the sampling frame for each province. We selected the required number of clusters from wards with probability proportionate to their all-age population size. For the second stage sampling, we used cluster sketch-mapping and segmentation to enrol 35 participants per cluster. Based on the 2011 census, we estimated 15% of the all-age population was aged 50 years and older and that a population unit of approximately 235 people would contain 35 eligible people. If a selected population unit was smaller than 235 people, a second, adjacent ward in which to continue enrolment was pre-selected at random. If a selected population unit had a population greater than 470 it was divided into two or more segments and one segment was randomly selected by the ward chief or a local influencing leader. Once a segment boundary with approximately 35 eligible participants was defined, a starting corner was randomly chosen, and eligible people were enumerated by teams systematically moving household-to-household until 35 study participants were enrolled. If a selected segment did not have 35 eligible participants, enumeration continued in a pre-selected neighbouring population unit until 35 participants were enrolled. Data collection teams were accompanied by a local guide in every cluster.

### ***Eligibility criteria***

All non-institutionalized people aged 50 years and older in Nepal were eligible for inclusion. To help verify age, the participant's birth year was compared to the death of King Mahendra and the start of the reign of King Birendra in 1972. Within a cluster, anyone resident for at least six months of the year was enrolled. Temporary visitors were excluded.

### ***Training***

Before starting fieldwork, data collection teams attended a standardized training week run by a qualified RAAB trainer (YDS) in each province. Training included an interobserver variation exercise and a supervised pilot cluster. All teams achieved a Kappa score of 0.6 or greater for interobserver agreement on visual acuity, lens status, and cause of vision impairment.

### ***Examination protocol***

Examinations were conducted at participants' households on the same day as enrolment. We recorded the age and sex for all participants. We recorded distance and near spectacle ownership status and measured presenting distance visual acuity (VA) (i.e., with spectacles if available) in each eye. We measured pinhole VA for any eye where the presenting VA was worse than 6/12. VA was measured using tumbling E optotype cards (6/60, 6/18, and 6/12 sizes) outdoors at 6 meters, 3 meters, or 1 meter as required to test VA at 1/60, 3/60, 6/60, 6/18, and 6/12 thresholds. Four out of five correct responses were required to pass at each threshold. Perception of light was tested for any eye worse than 1/60. All eyes underwent a lens examination with a pen torch and distant direct ophthalmoscopy. Any eyes with presenting VA worse than 6/12 were assigned a cause of vision impairment from a standardised list and then a principal cause of vision impairment assigned per participant. The principal cause was determined as the cause more amenable to treatment or prevention. Eyes with presenting VA worse than 6/12 and no obvious anterior segment cause of vision impairment were dilated for fundus examination. Any participants with cataract and pinhole

VA worse than 6/18 were asked about barriers to accessing treatment. Any participants who had received cataract surgery were examined further (type of surgery, reason for presenting VA worse than 6/12 if relevant) and asked about their surgical history (age at surgery, cost, place of surgery).

### ***Definitions***

We defined vision impairment and blindness based on presenting visual acuity (i.e., with correction if available) in the better eye, according to the International Classification of Disease (ICD-11) thresholds.[10] Blindness was worse than 3/60, severe vision impairment (SVI) was worse than 6/60 but better than or equal to 3/60, moderate vision impairment (MVI) was worse than 6/18 but better than or equal to 6/60, and mild vision impairment was worse than 6/12 but better than or equal to 6/18.

### ***Data management***

Data were collected on mobile Android devices. Three provinces used a mobile application developed for RAAB6 (mRAAB), and four used a beta version of the RAAB7 platform[9]. Data collected in mRAAB6 were converted to CSV files and emailed to survey coordinators upon completion of each cluster. Data were then uploaded to RAAB6 analysis software for processing (this process is now retired and no longer available). Data collected in the RAAB7 app were automatically synchronized to an Amazon Web Services cloud-based server when teams had internet connectivity.[9]

### ***Analysis***

A standardized epidemiological report was produced for each province using the RAAB7 automated analysis code available at <https://github.com/raabteam/raab7-analysis>. The analysis provided provincial age-sex weighted vision impairment prevalence estimates (post-stratified to the provincial 2021 Census population counts) and the principal causes of blindness and vision impairment within the sample. To estimate a weighted national



prevalence of vision impairment and blindness, each provincial dataset was exported from the RAAB software as a CSV file, appended in a single dataset, and imported into STATA 17. We used the svy command to account for the cluster survey design. We used unique cluster IDs to define the primary sampling unit (n=952) and a provincial identifier to define strata (n=7). To report age-sex-province weighted national estimates, we created a probability weight for fourteen 5-year age-sex categories (50-54, 55-59, 60-64, 65-69, 70-74, 75-79, 80+ for male and female). The probability weight was calculated by multiplying two weights: a provincial design weight (each of the seven provinces' proportion of the national population divided by 1/7, for male and female) multiplied by a sampling weight (the proportion of the sample in each 5-year age-sex group divided by the census proportion in the same age-sex group). The extrapolated magnitude of vision impairment was estimated by applying the age-sex-province weighted prevalence values reported in the paper to the 2021 census counts for female, male, and total populations separately; therefore, male and female estimates do not sum to total estimates.

This study is reported according to the relevant items in the STROBE checklist for cross-sectional studies.[10]

## **RESULTS**

We examined 32,565 participants of 33,228 enrolled (response rate 98%). Females made up 55% of the sample. The overall response rates in each province ranged from 95.4% to 99.5% (table 2).

Nationally, the age-sex-province weighted prevalence of blindness among the population 50 years and older was 1.1% (95% CI 1.0 - 1.2%). We estimated that 60,138 people aged 50 years and older were blind in Nepal. The prevalence of blindness was significantly higher among females (1.3% [95% CI 1.1 - 1.5%]) than males (0.9% [95% CI 0.7 - 1.0%]); the

difference in vision impairment prevalence by sex was not significantly higher at any other threshold of vision impairment (table 3). The prevalence of any vision impairment  $<6/12$  was 20.7% (95% CI 19.9 - 21.5%). Prevalence of any vision impairment  $<6/12$  was higher among females (21.8% [95%CI 20.9 - 22.7%]) than males (19.5% [95% CI 18.6 - 20.5%]).

The provincial-level variation in blindness prevalence is shown in Figure 2A and Table 4. The overall prevalence of blindness was significantly higher in Lumbini Province (1.8% [95% CI 1.3 - 2.2%]) than in other provinces except Madhesh Province (1.4% [95% CI 1.0 - 1.8%]) and Karnali Province (1.0% [95% CI 0.6 - 1.3%]). More than half (52%) of the total extrapolated magnitude of blindness cases were in Madhesh and Lumbini Provinces (table 4). The provincial level variation in the prevalence of any vision impairment  $<6/12$  is shown in Figure 2B. Madhesh Province (30.8% [95% CI 28.4 - 33.3%]) and Lumbini Province (27.3% [95% CI 25.0 - 29.7%]) had significantly higher prevalence estimates than the other five provinces (appendix).

Within the nationwide sample, cataract was the leading cause of blindness (65.2%), followed by non-trachomatous corneal opacity (6.1%), glaucoma (5.8%), and age-related macular degeneration (5.3%). Cataract surgical complications caused 1.8% of blindness and 4.6% of moderate visual impairment. Diabetic retinopathy was 0.8% of blindness cases nationally, while ‘other posterior segment conditions’ contributed 8.4% of blindness cases (table 5). Cataract was also the leading cause of severe vision impairment (83.9%) and moderate vision impairment (66.8%), while refractive error was the leading cause of mild vision impairment (66.5%) (table 5).

## **DISCUSSION**

Here we report the first nationally representative estimates of vision impairment and blindness, and their causes, in Nepal since 1981.[1] This study was designed as a series of

seven RAAB surveys representative of the population in each province, as well as the national population. The age-sex-province weighted national prevalence of blindness was 1.1% among the population 50 years and older.

The prevalence of blindness was similar to that found in a 2017 RAAB in Bhutan (1.0% [95% CI 0.5-1.4%]) but was significantly lower than was found in India in a nationally representative series of RAABs done in 2015-2019 (2.0% [95% CI 1.9–2.1%]).[11, 12]

Blindness prevalence was also lower than estimates from recent subnational RAABs in neighbouring countries, including Bangladesh, Tibet, Tripura state of India, and Lahore (Pakistan) (table 6).[13-17] Within the South Asia region, the eye care system in Nepal, which is a geographically challenging country with a modest per capita gross domestic product, has achieved relatively good control of blindness. Inter-sectorial coordination between the government, non-governmental, and private sectors, help from international agencies, an emphasis on primary eye care, and outreach have contributed to this success.[8]

Blindness prevalence was much lower than in similarly mountainous Afghanistan, and relative peace and stability have also likely aided progress in Nepal.[18]

The prevalence of blindness and any vision impairment <6/12 were both higher in women. This is consistent with population-based surveys from India, Bangladesh, and elsewhere in the region. [12, 13, 15, 16, 19, 20, 21] Interventions such as differential treatment pricing, targeted subsidies, and awareness campaigns could help reduce this gap between women and men.

In the federal government system in Nepal, the responsibility for health administration and planning is devolved to the provincial level. Historically, vision impairment in Nepal is yet to be equally distributed across geographic regions. A 2011 survey of people aged 15 years and older in three districts, each representing one of Nepal's three ecological zones (mountainous greater Himalayas, hilly lesser Himalayas, and Terai plains) found that the prevalence of

vision impairment was higher in the plains district than the hills or mountains districts.[22] Similarly, we found that Lumbini and Madesh Provinces in the Terai region had a higher prevalence of blindness and any vision impairment compared to the mainly hilly and sparsely populated Sudurpaschim Province in the west and Bagmati Province in Kathmandu valley, where the national capital and largest city is located with more eye health care facilities than other provinces. Lumbini and Madhesh Provinces have the largest provincial populations in Nepal. They border the Indian states of Uttar Pradesh and Bihar, which have the lowest health care indicators among all 38 Indian states. [23] Both Lumbini and Madhesh Provinces have three major eye hospitals performing high-volume, high-quality cataract surgery; however, more services are needed to meet the need for eye care services of the Nepali population in these provinces as nearly half the hospital workload is catering to patients from neighbouring Indian states.

Cataract was the leading cause of blindness (65%), severe vision impairment (84%) and moderate vision impairment (67%). Cataract surgical complications caused 2% of blindness and 5% of moderate vision impairment; however, population-based surveys reflect the outcomes of surgery done by multiple providers over many years, therefore it is also important to routinely monitor current outcomes through facility level data to promote effective and safe surgery. A separate publication reporting effective cataract surgical coverage and surgical outcomes from this survey series is in preparation. Non-trachomatous corneal opacity (6% of bilateral blindness) was a significant issue in a populace where ocular trauma and corneal infection are common.[24] Investment in prevention and early referral strategies, as well as eye banking, is needed to address corneal blindness, particularly when the additional magnitude of unilateral corneal opacification (not reported here) is considered. The RAAB survey methodology is not designed to report the prevalence of specific eye conditions. It may overestimate avoidable anterior segment causes of vision impairment

(refractive error and cataract) while under-estimating posterior segment conditions.[25]

Nevertheless, glaucoma, age-related macular degeneration and the category of ‘other posterior segment causes’ all contributed to blindness and—along with corneal disease—will require a strategy for sub-specialty expertise to manage the conditions in each province.

### ***Limitations***

RAAB is a rapid survey methodology that uses simple examination equipment and a protocol that prioritizes identifying avoidable causes of vision impairment. RAAB is not designed to estimate the prevalence of certain eye conditions or collect data on risk factors for vision impairment. Three provinces were surveyed using the mobile application developed for RAAB6, while four were surveyed using RAAB7; the RAAB7 app guided data collectors on more or less appropriate responses. However, the questionnaire itself was identical for all provinces. The seven surveys took longer to complete than anticipated because data collection was interrupted by the COVID-19 pandemic in 2020.

### **CONCLUSION**

The prevalence of blindness was higher among women than men and varied by province. The Lumbini and Madesh Provinces in the Terai (plains) region had higher prevalence of blindness than elsewhere. Cataract was the leading cause of blindness, severe vision impairment and moderate vision impairment while refractive error was the leading cause of mild vision impairment.

## REFERENCES:

1. Brilliant LB, Pokhrel RP, Grasset NC, Lepkowski JM, Kolstad A, Hawks W, et al. Epidemiology of blindness in Nepal. *Bulletin of the World Health Organization*. 1985;63:375.
2. Nepal Netra Jyoti Sangh. <http://nnjs.org.np> Accessed on 18/07/2024.
3. Nepal BP. The right to sight. *Kathmandu University Medical Journal*. 2012;10:1-2.
4. Pokharel GP, Regmi G, Shrestha SK, Negrel AD, Ellwein L. Prevalence of blindness and cataract surgery in Nepal. *British journal of ophthalmology*. 1998;82:600-5.
5. Sapkota YD, Pokharel GP, Nirmalan PK, Dulal S, Maharjan IM, Prakash K. Prevalence of blindness and cataract surgery in Gandaki Zone, Nepal. *British journal of ophthalmology*. 2006;90:411-6.
6. Sherchan A, Kandel RP, Sharma MK, Sapkota YD, Aghajanian J, Bassett KL. Blindness prevalence and cataract surgical coverage in Lumbini Zone and Chetwan District of Nepal. *British journal of ophthalmology*. 2010;94:161-6.
7. Sapkota YD, Limburg H. The epidemiology of blindness in Nepal: 2012. Kathmandu: Nepal Netra Jyoti Sangh. 2012 May 30. <https://www.iapb.org/resources/epidemiology-of-blindness-in-nepal>
8. Gogate P, Saravanan S, Borah RR, Gurung R, Mishra SK, Sapkota YD, et al. Paediatric ophthalmology in Nepal. *Eye*. 2024;38:10-2.
9. RAAB 7 platform <https://wellcomeopenresearch.org/articles/9-133/v1>
10. Cevallos M, Egger M. STROBE (STrengthening the Reporting of OBServational studies in Epidemiology). *Guidelines for reporting health research: a user's manual*. 2014:169-79.
11. Lepcha NT, Sharma IP, Sapkota YD, Das T, Phuntsho T, Tenzin N, et al. Changing trends of blindness, visual impairment and cataract surgery in Bhutan: 2009–2018. *PLoS One*. 2019;14:e0216398.

12. Neena J, Rachel J, Praveen V, Murthy GV, RAAB India Study Group. Rapid assessment of avoidable blindness in India. *PloS one*. 2008;3:e2867.
13. Muhit M, Wadud Z, Islam J, Khair Z, Shamanna BR, Jung J, et al. Generating evidence for program planning: rapid assessment of avoidable blindness in Bangladesh. *Ophthalmic epidemiology*. 2016;23:176-84.
14. Jiachu D, Jiang F, Luo L, Zheng H, Duo J, Yang J, et al. Blindness and eye disease in a Tibetan region of China: findings from a rapid assessment of avoidable blindness survey. *BMJ Open Ophthalmology*. 2018;3:e000209.
15. Marmamula S, Yellapragada S, Khanna RC. Population Based Assessment of Prevalence and Causes of Vision Impairment in the North-eastern State of Tripura, India–The Tripura Eye Survey. *Ophthalmic Epidemiology*. 2020;27:283-8.
16. Jolley E, Buttan S, Engels T, Gillani M, Jadoon MZ, Kabona G, et al. Prevalence of visual impairment and coverage of cataract surgical services: associations with sex, disability, and economic status in five diverse sites. *Ophthalmic epidemiology*. 2020;27:429-37.
17. Pradhan S, Deshmukh A, Shrestha PG, Basnet P, Kandel RP, Lewallen S, et al. Prevalence of blindness and cataract surgical coverage in Narayani Zone, Nepal: a rapid assessment of avoidable blindness (RAAB) study. *British Journal of Ophthalmology*. 2018;102:291-4.
18. Sapkota Y, Alizoi N, Siddiqi AM, Naseem M, Salaam AS, ur Rehman A, D'Esposito F, Das T. Rapid assessment of prevalence of blindness and cataract surgery in Kabul province, Afghanistan. *BMJ Open Ophthalmology*. 2021;6:e000790.
19. Patil S, Gogate P, Vora S, Ainapure S, Hingane RN, Kulkarni AN, et al. Prevalence, causes of blindness, visual impairment and cataract surgical services in Sindhudurg

district on the western coastal strip of India. *Indian journal of ophthalmology*.

2014;62:240-5.

20. Ye Q, Chen Y, Yan W, Wang W, Zhong J, Tang C, et al. Female Gender Remains a Significant Barrier to Access Cataract Surgery in South Asia: A Systematic Review and Meta-Analysis. *Journal of Ophthalmology*. 2020;2020:2091462.
21. Prasad M, Malhotra S, Kalaivani M, Vashist P, Gupta SK. Gender differences in blindness, cataract blindness, and cataract surgical coverage in India: a systematic review and meta-analysis. *British Journal of Ophthalmology*. 2020;104:220-4.
22. Shrestha MK, Sun S, Limbu B, Paudel M, Khanal S, Pradhan B, Shrestha M. Prevalence and causes of visual impairment and blindness in three ecological regions of Nepal. *Nepalese Journal of Ophthalmology*. 2021;13:4-12.
23. Hanagodimath SV. Regional Disparity in Per Capita Income in India: A Study on Inter-state and Intra-state Analysis. *Monograph Series*. 2019 Sep(105).
24. Taneja A, Vanathi M, Kishore A, Noah J, Sood S, Emery P, et al. Corneal blindness and eye banking in South-East Asia. *South-East Asia Eye Health: Systems, Practices, and Challenges*. 2021:255-66.
25. Zhang XJ, Leung CK, Li EY, Musch DC, Zheng CR, He MG, Chang DF, Lam DS. Diagnostic accuracy of rapid assessment of avoidable blindness: a population-based assessment. *American Journal of Ophthalmology*. 2020;213:235-43.

**Figure 1. Provincial-level map of Nepal**

**Figure 2. Age-sex weighted prevalence of blindness and any vision impairment worse than 6/12 in Nepal by province.**



**Table 1. Sampling and data collection information for each provincial RAAB survey in Nepal 2018-2021.**

| Province     | Sampling information              |                                             |                      | Data collection              |                        |                   |
|--------------|-----------------------------------|---------------------------------------------|----------------------|------------------------------|------------------------|-------------------|
|              | Estimated prevalence of blindness | Population 50 years and older (2011 census) | Sample size required | Number of clusters (size 35) | Data collection period | RAAB version used |
| Koshi        | 3.3%                              | 743,329                                     | 4360                 | 125                          | Dec 2018 - Mar 2020    | 6                 |
| Madhesh      | 3.5%                              | 760,911                                     | 4109                 | 118                          | Sept 2019 - Feb 2020   | 7                 |
| Bagmati      | 2.5%                              | 831,208                                     | 5800                 | 166                          | June 2019 - Dec 2019   | 7                 |
| Gandaki      | 3.0%                              | 399,059                                     | 4789                 | 137                          | Jan 2019 - Feb 2020    | 6                 |
| Lumbini      | 3.0%                              | 655,927                                     | 4808                 | 138                          | July 2018 - Dec 2018   | 6                 |
| Karnali      | 2.5%                              | 190,016                                     | 4067                 | 117                          | Jun 2019 - Dec 2019    | 7                 |
| Sudurpaschim | 2.9%                              | 250,982                                     | 4619                 | 132                          | Feb 2020 - May 2021    | 7                 |

**Table 2. The response rate for each provincial RAAB and nationally.**

| Province        | Female        |              |             | Male          |              |             | Total         |               |             |
|-----------------|---------------|--------------|-------------|---------------|--------------|-------------|---------------|---------------|-------------|
|                 | Enrolled n    | Examined n   | Examined %  | Enrolled n    | Examined n   | Examined %  | Enrolled n    | Examined n    | Examined %  |
| Koshi           | 2,266         | 2,221        | 98.0        | 1,965         | 1,900        | 96.7        | 4,231         | 4,121         | 97.4        |
| Madhesh         | 2,168         | 2,158        | 99.5        | 1,907         | 1,897        | 99.5        | 4,075         | 4,055         | 99.5        |
| Bagmati         | 3,331         | 3,204        | 96.2        | 2,479         | 2,338        | 94.3        | 5,810         | 5,542         | 95.4        |
| Gandaki         | 2,618         | 2,583        | 98.7        | 2,176         | 2,134        | 98.1        | 4,794         | 4,717         | 98.4        |
| Lumbini         | 3,104         | 3,082        | 99.3        | 2,538         | 2,500        | 98.5        | 5,642         | 5,582         | 98.9        |
| Karnali         | 2,157         | 2,114        | 98.0        | 2,538         | 2,500        | 98.5        | 4,069         | 3,983         | 97.9        |
| Sudurpaschim    | 2,603         | 2,573        | 98.9        | 2,004         | 1,992        | 99.4        | 4,607         | 4,565         | 99.1        |
| <b>National</b> | <b>18,247</b> | <b>17935</b> | <b>98.3</b> | <b>14,981</b> | <b>14630</b> | <b>97.7</b> | <b>33,228</b> | <b>32,565</b> | <b>98.0</b> |

**Table 3. Age-sex-province weighted estimates of blindness and vision impairment in Nepal.**

|                    | Female        |             |                           | Male          |            |                           | Total         |            |                           |
|--------------------|---------------|-------------|---------------------------|---------------|------------|---------------------------|---------------|------------|---------------------------|
|                    | Weighted<br>% | 95% CI      | Extrapolated<br>magnitude | Weighted<br>% | 95% CI     | Extrapolated<br>magnitude | Weighted<br>% | 95% CI     | Extrapolated<br>magnitude |
| <b>Blind</b>       | 1.3           | 1.1 - 1.5   | 36,311                    | 0.9           | 0.7 - 1.0  | 24,066                    | 1.1           | 1.0 - 1.2  | 60,138                    |
| <b>Severe VI</b>   | 1.9           | 1.7 - 2.1   | 53,070                    | 1.5           | 1.3 - 1.8  | 40,109                    | 1.7           | 1.5 - 1.9  | 92,941                    |
| <b>Moderate VI</b> | 7.9           | 7.4 - 8.5   | 220,659                   | 7.2           | 6.7 - 7.8  | 192,525                   | 7.6           | 7.2 - 8.0  | 415,501                   |
| <b>Mild VI</b>     | 10.7          | 10.1 - 11.3 | 298,868                   | 10.0          | 9.4 - 10.6 | 267,396                   | 10.3          | 9.9 - 10.8 | 563,113                   |

**Table 4. Age-sex weighted prevalence of bilateral blindness by province.**

| Province     | Female     |           |                        | Male       |           |                        | Total      |           |                        |
|--------------|------------|-----------|------------------------|------------|-----------|------------------------|------------|-----------|------------------------|
|              | Weighted % | 95% CI    | Extrapolated magnitude | Weighted % | 95% CI    | Extrapolated magnitude | Weighted % | 95% CI    | Extrapolated magnitude |
| Koshi        | 0.9        | 0.4 - 1.3 | 4,581                  | 0.8        | 0.4 - 1.2 | 4,017                  | 0.8        | 0.5 - 1.1 | 8,598                  |
| Madhesh      | 1.7        | 1.0 - 2.3 | 8,017                  | 1.1        | 0.6 - 1.7 | 5,943                  | 1.4        | 1.0 - 1.8 | 13,960                 |
| Bagmati      | 1.0        | 0.6 - 1.3 | 5,998                  | 0.4        | 0.0 - 0.8 | 2,384                  | 0.7        | 0.4 - 0.9 | 8,382                  |
| Gandaki      | 1.2        | 0.7 - 1.7 | 3,736                  | 0.6        | 0.2 - 1.0 | 1,614                  | 0.9        | 0.6 - 1.2 | 5,351                  |
| Lumbini      | 2.1        | 1.6 - 2.7 | 9,939                  | 1.4        | 0.8 - 2.1 | 6,323                  | 1.8        | 1.3 - 2.2 | 16,262                 |
| Karnali      | 0.9        | 0.4 - 1.3 | 1,144                  | 1.1        | 0.6 - 1.6 | 1,372                  | 1.0        | 0.6 - 1.3 | 2,517                  |
| Sudurpaschim | 0.8        | 0.4 - 1.1 | 1,903                  | 0.6        | 0.3 - 1.0 | 1,284                  | 0.7        | 0.4 - 0.9 | 3,187                  |

**Table 5. The causes of blindness and vision impairment in the national sample**

|                                        | <b>Blindness</b> |          | <b>Severe VI</b> |          | <b>Moderate VI</b> |          | <b>Mild VI</b> |          |
|----------------------------------------|------------------|----------|------------------|----------|--------------------|----------|----------------|----------|
|                                        | <b>N</b>         | <b>%</b> | <b>n</b>         | <b>%</b> | <b>n</b>           | <b>%</b> | <b>n</b>       | <b>%</b> |
| <b>Refractive error</b>                | 1                | 0.3      | 12               | 2.0      | 534                | 19.7     | 2,358          | 66.5     |
| <b>Aphakia</b>                         | 1                | 0.3      | 2                | 0.3      | 3                  | 0.1      | 2              | 0.1      |
| <b>Cataract</b>                        | 257              | 65.2     | 501              | 83.9     | 1,810              | 66.8     | 953            | 26.9     |
| <b>Cataract Surgical Complications</b> | 7                | 1.8      | 11               | 1.8      | 126                | 4.6      | 79             | 2.2      |
| <b>Trachomatous Corneal Opacity</b>    | 1                | 0.3      | 0                | 0.0      | 0                  | 0.0      | 0              | 0.0      |
| <b>Other Corneal Opacity</b>           | 24               | 6.1      | 7                | 1.2      | 35                 | 1.3      | 31             | 0.9      |
| <b>Pterygium</b>                       | 0                | 0.0      | 0                | 0.0      | 9                  | 0.3      | 8              | 0.2      |
| <b>Phthisis</b>                        | 7                | 1.8      | 1                | 0.2      | 4                  | 0.1      | 5              | 0.1      |
| <b>Glaucoma</b>                        | 23               | 5.8      | 11               | 1.8      | 20                 | 0.3      | 12             | 0.3      |
| <b>Diabetic Retinopathy</b>            | 3                | 0.8      | 3                | 0.5      | 16                 | 0.3      | 11             | 0.3      |
| <b>AMD</b>                             | 21               | 5.3      | 19               | 3.2      | 64                 | 2.4      | 39             | 1.1      |
| <b>Myopic degeneration</b>             | 3                | 0.8      | 4                | 0.7      | 11                 | 0.2      | 6              | 0.2      |

|                                |     |       |     |       |       |       |       |       |
|--------------------------------|-----|-------|-----|-------|-------|-------|-------|-------|
| <b>Other posterior segment</b> | 33  | 8.4   | 22  | 3.7   | 70    | 1.0   | 36    | 1.0   |
| <b>All other globe/CNS</b>     | 13  | 3.3   | 4   | 0.7   | 8     | 0.2   | 7     | 0.2   |
| <b>Total</b>                   | 394 | 100.0 | 597 | 100.0 | 2,711 | 100.0 | 3,547 | 100.0 |

**Table 6: Comparison of blindness prevalence in Nepal and other neighbouring countries.**

| Survey location       | Year | Sample size | Age range | Blindness prevalence (definition) | Main cause                           | Per Capita | Author (reference) |
|-----------------------|------|-------------|-----------|-----------------------------------|--------------------------------------|------------|--------------------|
| Nepal                 | 1998 | 4,600       | 45 +yr    | 5.3% (legal blind)                | Cataract (78%)                       |            | Pokharel [4]       |
| Bangladesh            | 2016 | 21,596      |           | 2.2% (WHO)                        | Cataract (75.8%)                     | \$ 2688    | Muhit M [13]       |
| Bhutan                | 2018 | 5,050       |           | 1% (WHO)                          | Cataract (53.8%)                     | \$ 3266    | Lepcha NT [11]     |
| Narayani Zone, Nepal  | 2018 | 4,771       |           | 1.2% (WHO)<br>2.7% (SVI)          | Cataract (?)                         |            | Pradhan S [17]     |
| Tibet, China          | 2018 | 4,763       |           | 1.6% (WHO)                        | Cataract (39.5%)                     |            | Jiachu D [14]      |
| Lahore, Pakistan      | 2020 | 2,958       |           | 1.2% (WHO)                        | Cataract (81%)                       | \$ 1597    | Jolley E [16]      |
| Tripura, India        | 2020 | 4,500       |           | 1.5% (WHO)                        | Cataract (54.5%)                     | \$ 2389    | Marmamula [15]     |
| Nepal                 | 2021 | 5,234       | 50+       | 2.3% (WHO)                        | 95% cataract + RE                    |            | Shrestha MK [22]   |
| Kabul, Afghanistan    | 2021 | 3,751       |           | 2.4% (WHO)                        | Cataract (36.8%)                     | \$ 364     | Sapkota [18]       |
| Nepal (present study) | 2021 | 32,503      | 50+       | 1.1% (WHO)<br>1.7% (SVI)          | Cataract (65.3%)<br>Cataract (83.9%) | \$ 1337    | -                  |

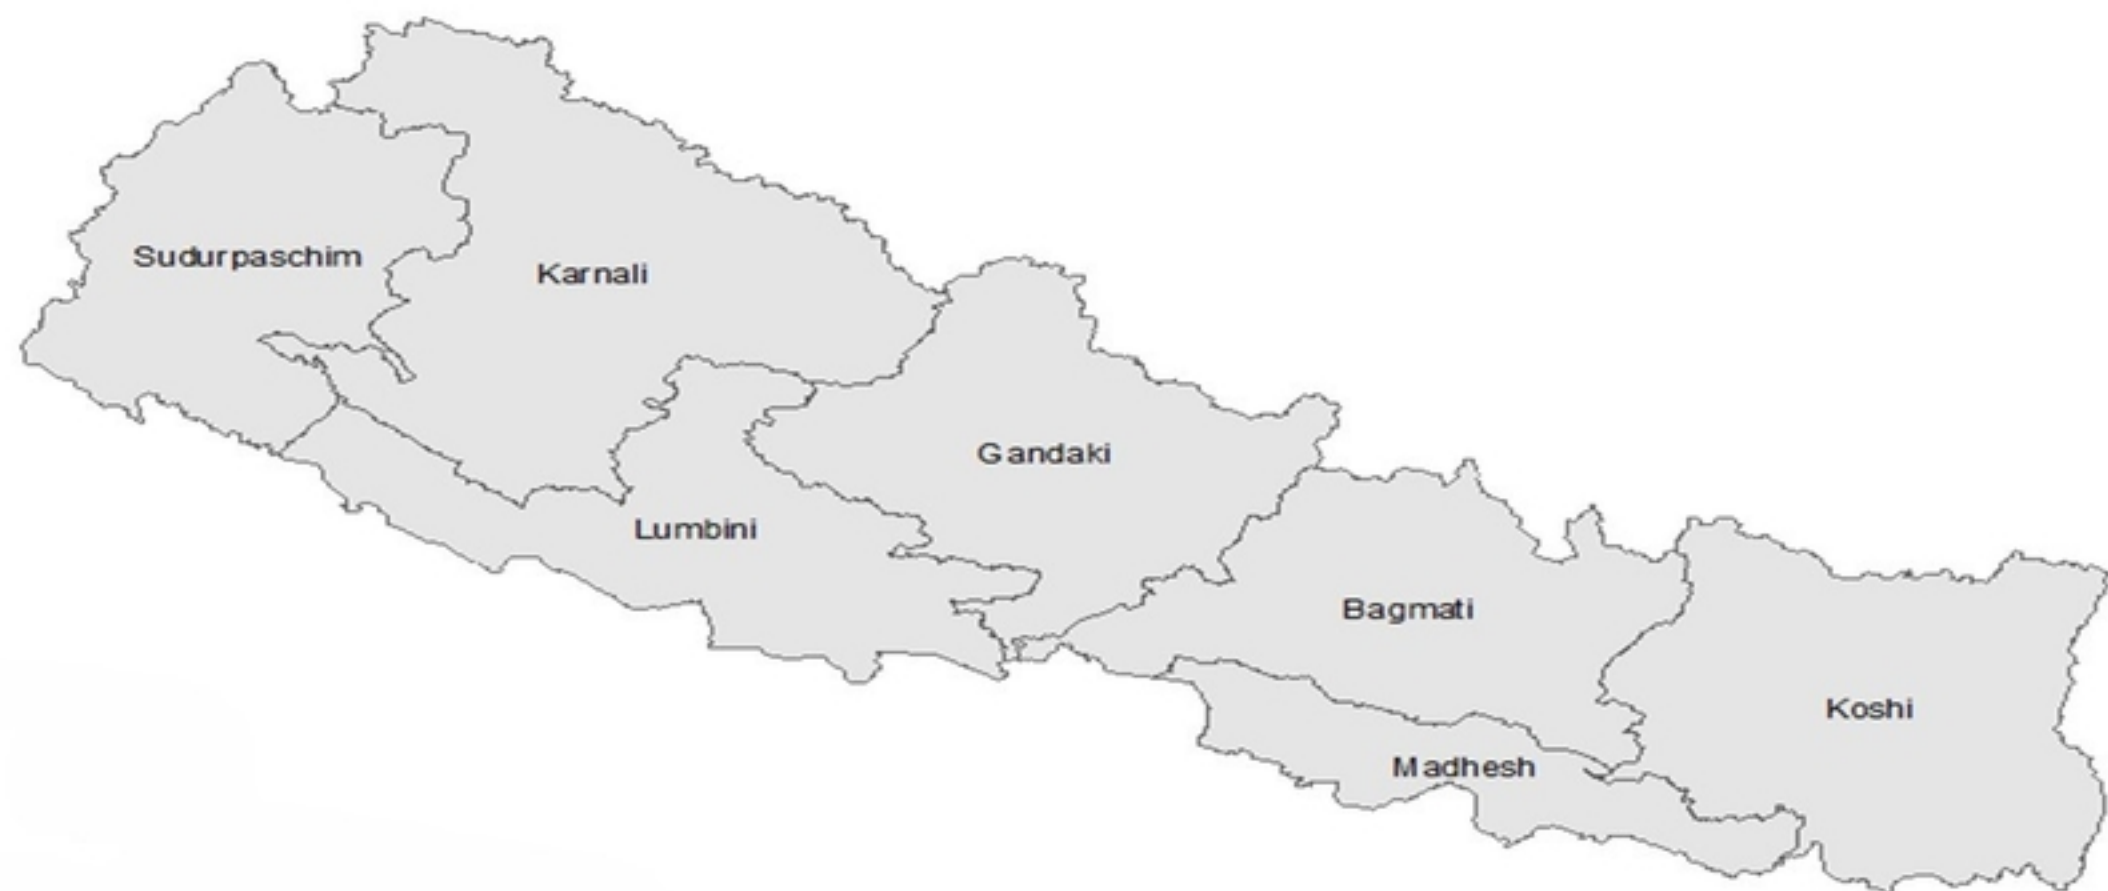

Figure 1



**A. Age-sex weighted prevalence of blindness in Nepal by province (%)**

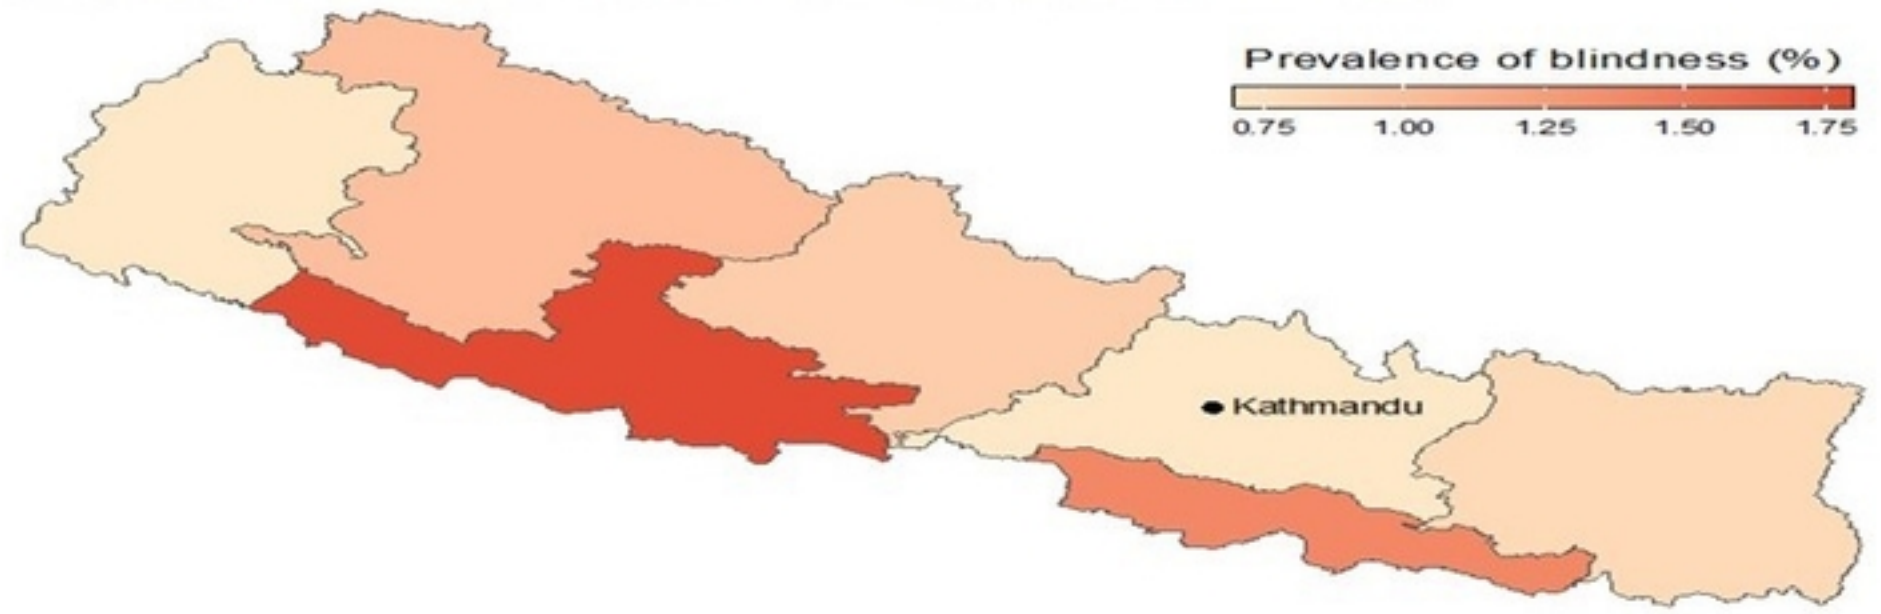

**B. Age-sex weighted prevalence of any vision impairment <6/12 by province (%)**

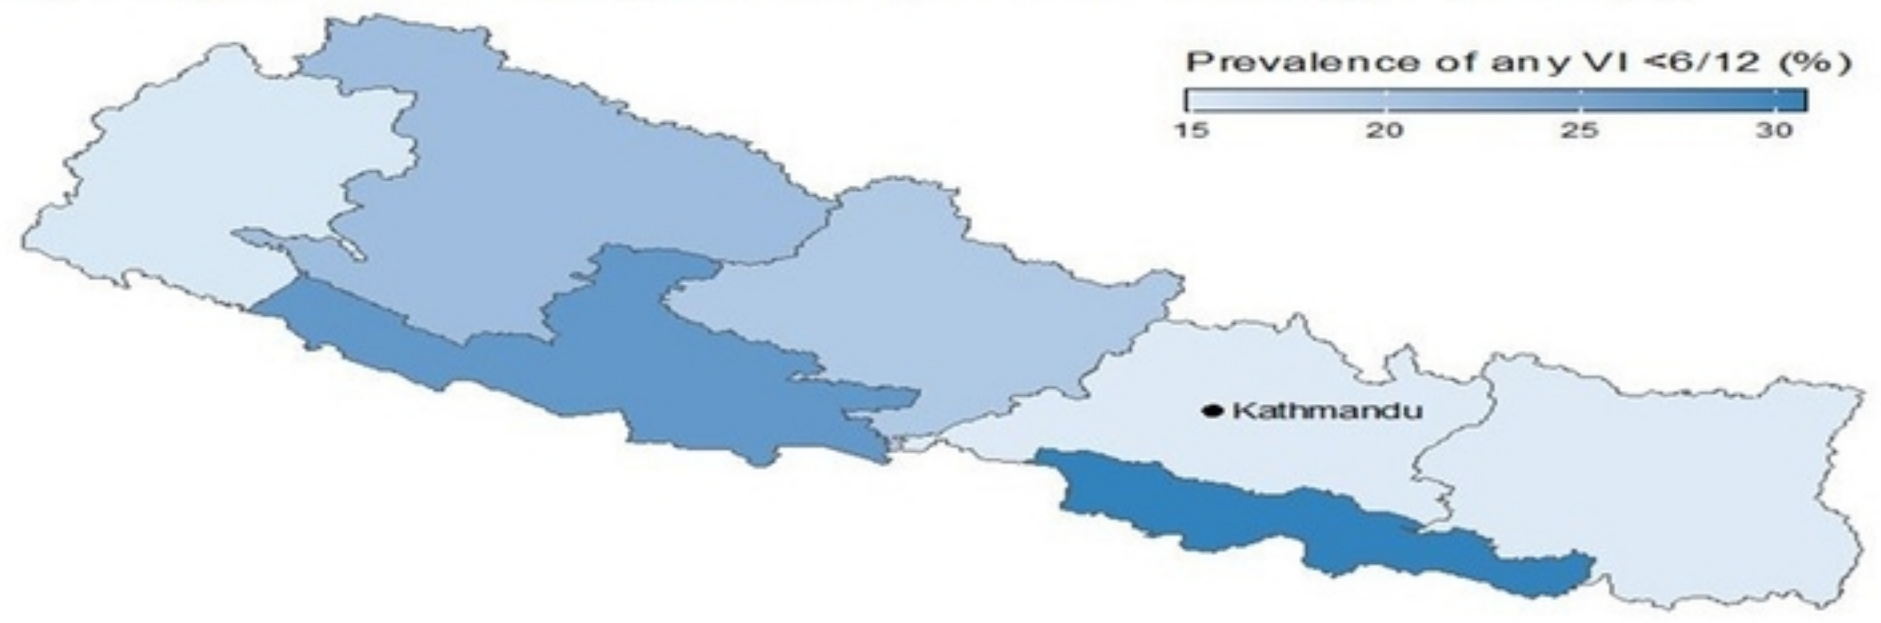

Figure 2
